# Supplementary material
Source: publisher site journal article supplement (https://www.spandidos-publications.com/2891/downloadSupplementary)

Figure S1. TPL treatment induced autophagic cell death in SKOV3 ovarian cancer cells. (A) SKOV3 cells were treated with indicated concentrations of TPL for 24 h, LC3 levels were determined by western blotting. Panel on the left revealing representative images of western blot results, and the panel on the right showing corresponding mean LC3-II/LC3-I ratio. Data indicated that TPL induced autophagy in SKOV3 ovarian cancer cells. \* $P < 0.05$  and \*\* $P < 0.01$  vs. the control (untreated) group. (B) SKOV3 cells were pre-incubated with or without autophagy inhibitor 3-MA (10 mM) for 1 h, followed by 24-h TPL (50 nM) treatment. TPL cytotoxicity was detected by CCK-8 assay. Results were presented as the mean  $\pm$  SD for three independent experiments. \* $P < 0.01$  vs. the Con group. # $P < 0.01$  vs. the TPL group. Data demonstrated that 3-MA could partially reverse TPL-induced cell death in SKOV3 cells, suggesting that TPL-induced SKOV3 cell death was partially mediated by autophagy. TPL, triptolide; 3-MA, 3-methyladenine; CCK-8, Cell Counting Kit-8; Con, control.

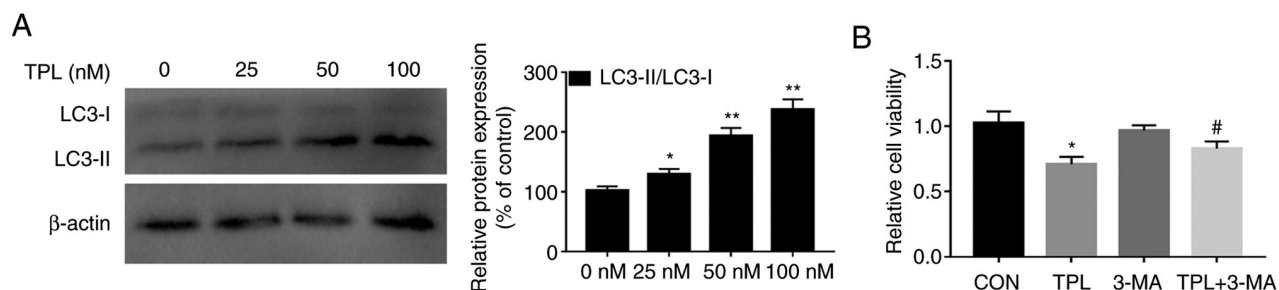

Supplement: Supplementary file 1 [file downloadSupplementary]
